# Supplementary material for: Genomic prediction for rust resistance in pea
Source: Frontiers journal article supplement (doi:10.3389/fpls.2024.1429802), 2024-07-23
Supplement: Image_2.pdf [file Image_2.pdf]

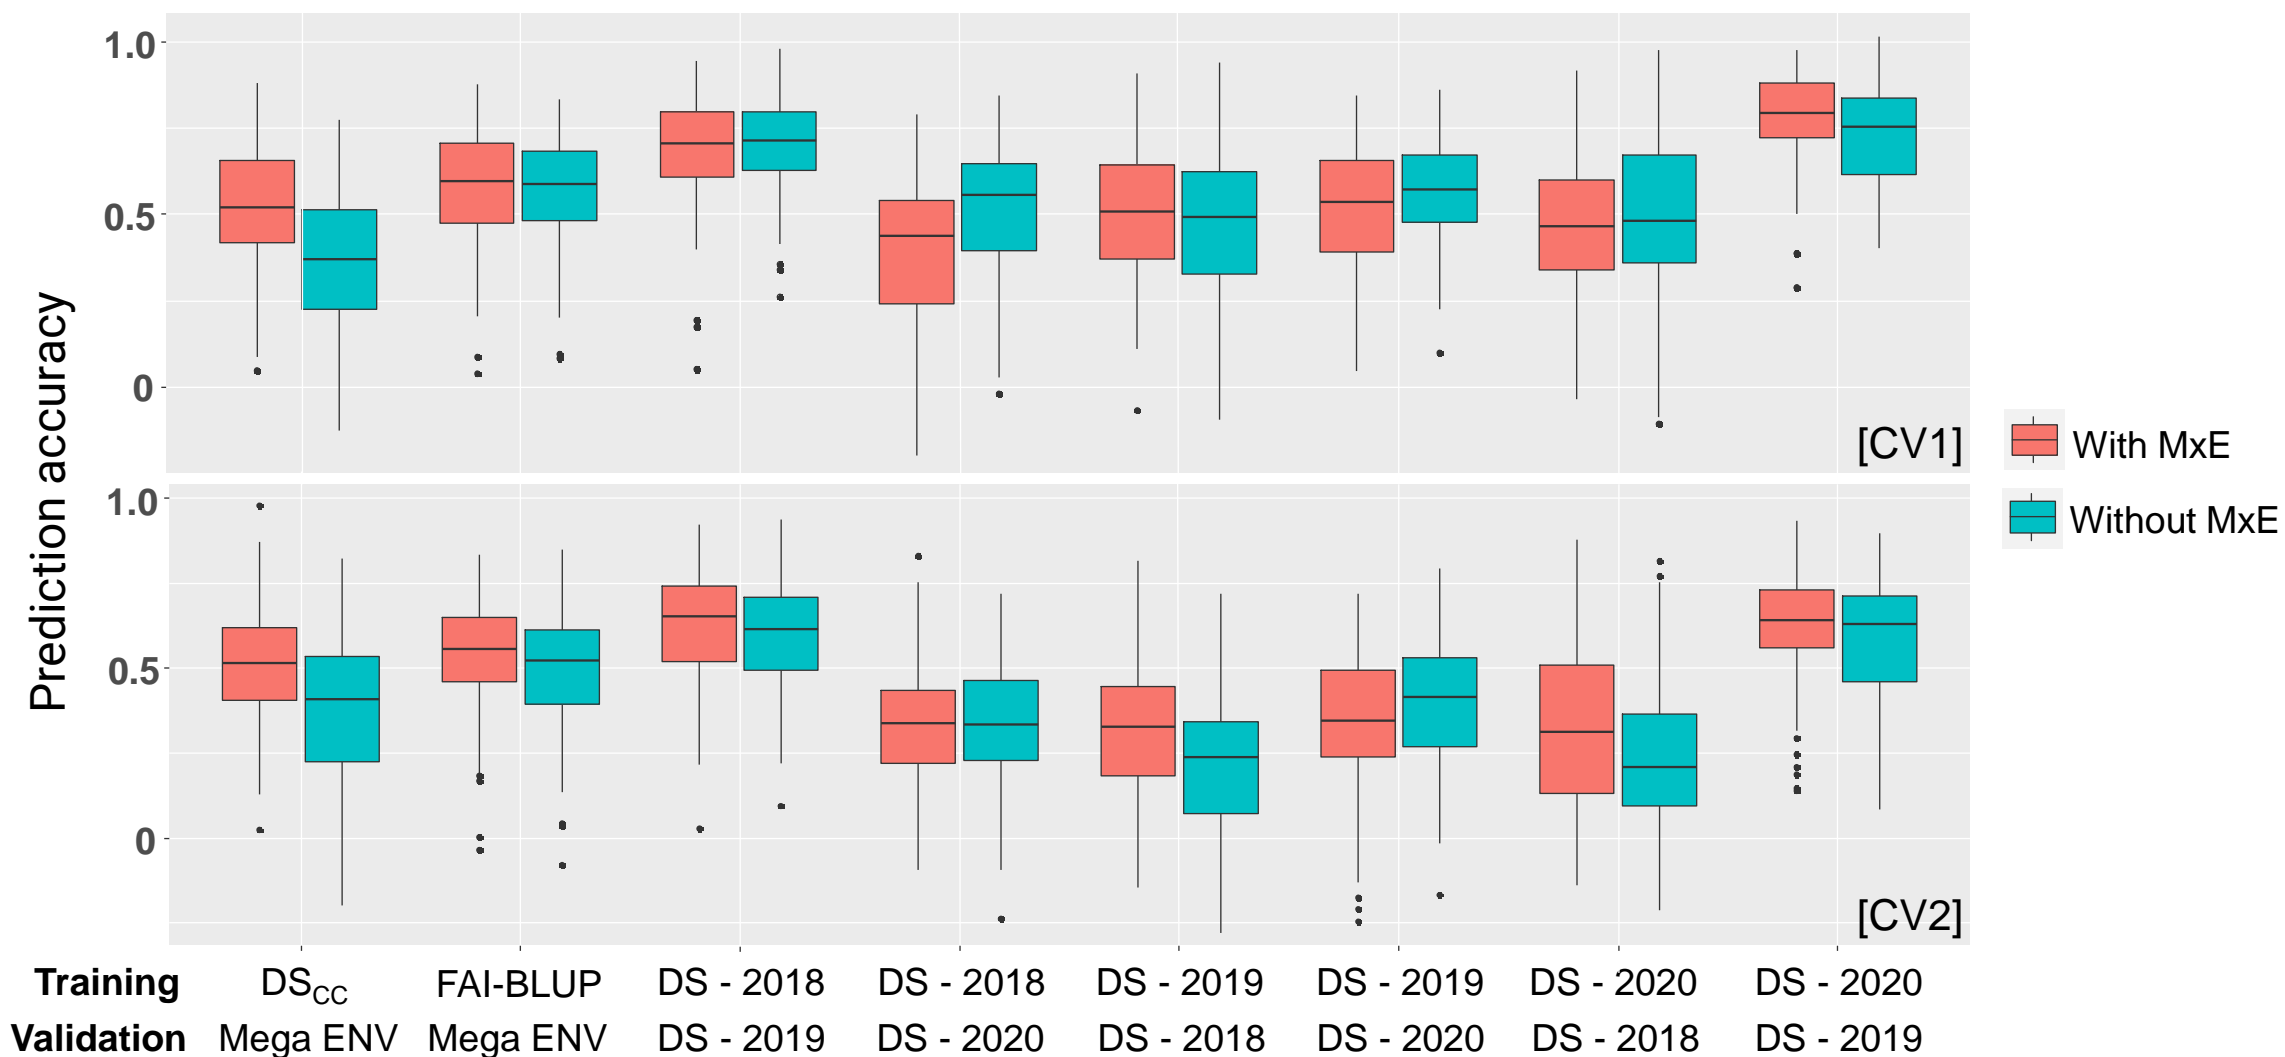

**Supplementary Figure 2.** Prediction accuracy of GBLUP model in two cross-validation schemes (CV1 at the top and CV2 at the bottom) based in the training/validation test described at the bottom of each boxplot.
